# Supplementary material
Source: Springer Nature journal article supplement (https://www.springermedizin.de/resource/supplementary/12916_2013_919_MOESM2_ESM.pdf/9598826)
Supplement: MOESM2 [file 9598826]

**10,200** articles yielded from initial search

- **5620** - Pubmed
- **2858** - Embase
- **1722** - Africa Wide Information

**2303** excluded after removal of duplicates

**7815** excluded after scanning titles/abstracts

**47** excluded after review of full article (see **Additional File A2**)

- 16** - Cohort not representative of children with malaria
- 14** - Predominantly adults
- 8** - Microbiological data incomplete or not reported
- 7** - Unable to extract sufficient data
- 6** - Cohort described elsewhere in another paper
- 4** - Not sub Saharan Africa

**4** articles included after scanning reference lists from selected articles

**25** articles included in final analysis
